# Supplementary material
Source: PubMed Central journal article supplement (PMC8700280)
Supplement: mmc1.pdf [file mmc1.pdf]

# THE LANCET Oncology

## Supplementary appendix

This appendix formed part of the original submission and has been peer reviewed. We post it as supplied by the authors.

Supplement to: Ligumsky H, Dor H, Etan T, et al. Immunogenicity and safety of BNT162b2 mRNA vaccine booster in actively treated patients with cancer. *Lancet Oncol* 2022; published online Dec 23. [https://doi.org/10.1016/S1470-2045\(21\)00715-4](https://doi.org/10.1016/S1470-2045(21)00715-4).

## Supplementary appendix: Immunogenicity and Safety of BNT162b2 mRNA

### Vaccine Booster in Actively Treated Cancer Patients

Table S1: clinical characteristics of study participants.....1

Table S2: Immunogenicity response following 3<sup>rd</sup> dose in patients with cancer compared to healthy controls.....2

Figure S1: Systemic side effects following BNT162b2 mRNA 3<sup>rd</sup> dose vaccination among 72 actively treated cancer patients and matched control by age and sex.....3

Table S1: clinical characteristics of study participants

|                                                                         |                                 | <b>Cancer Patients<br/>N=72</b> | <b>Healthy Control<br/>N=144</b> | <b>P Value</b> |
|-------------------------------------------------------------------------|---------------------------------|---------------------------------|----------------------------------|----------------|
| <b>Median Age, years (IQR)</b>                                          |                                 | 62 (48.25-71)                   | 62 (48.25-66)                    | 0.25           |
| <b>Female, N (%)</b>                                                    |                                 | 47 (65.2)                       | 94 (65.2)                        | 1              |
| <b>Days from 3<sup>rd</sup> dose to SARS-CoV2 Ab test, Median (IQR)</b> |                                 | 33 (21-43.75)                   | 27 (23-29)                       | 0.0056         |
| <b>Cancer type, N (%)</b>                                               | Breast                          | 21 (28.2)                       | NA                               |                |
|                                                                         | Gastrointestinal                | 20 (27.9)                       |                                  |                |
|                                                                         | NSCLC                           | 7 (9.7)                         |                                  |                |
|                                                                         | Gynecological                   | 6 (8.3)                         |                                  |                |
|                                                                         | Sarcoma                         | 6 (8.3)                         |                                  |                |
|                                                                         | CNS                             | 3 (4.2)                         |                                  |                |
|                                                                         | Genitourinary                   | 2 (2.8)                         |                                  |                |
|                                                                         | Skin cancers including melanoma | 2 (2.8)                         |                                  |                |
|                                                                         | Head and Neck                   | 2 (2.8)                         |                                  |                |
|                                                                         | SCLC                            | 2 (2.8)                         |                                  |                |
|                                                                         | Mesothelioma                    | 1 (1.4)                         |                                  |                |
| <b>Cancer Stage, N (%)</b>                                              | Local                           | 19 (26.8)                       | NA                               |                |
|                                                                         | Metastatic                      | 53 (74.7)                       |                                  |                |
| <b>Chemotherapy based treatment, N (%)</b>                              |                                 | 45 (62.5)                       | NA                               |                |

P values derived from the non-parametric Mann-Whitney U test, two-sided. NA, not applicable; IQR= Interquartile range; NSCLC,=Non small cell lung cancer; CNS=Central nervous system; SCLC=Small cell lung cancer.

**Table S2: Immunogenicity response following 3<sup>rd</sup> dose in patients with cancer compared to healthy controls**

|                                                                          | Cancer Patients<br>(N=72)      |                                 | Healthy control<br>(N=144)     |                               | P Value                                                                                                              | Estimated<br>difference (95%<br>CI)                                                                                                  |
|--------------------------------------------------------------------------|--------------------------------|---------------------------------|--------------------------------|-------------------------------|----------------------------------------------------------------------------------------------------------------------|--------------------------------------------------------------------------------------------------------------------------------------|
|                                                                          | Before 3 <sup>rd</sup><br>dose | After 3 <sup>rd</sup><br>dose   | Before<br>3 <sup>rd</sup> dose | After 3 <sup>rd</sup><br>dose |                                                                                                                      |                                                                                                                                      |
| <b>Median IgG<br/>Ab titer<br/>(IQR), WHO<br/>BAU/mL*</b>                | 24.64<br>(6.82-<br>69.83)      | 1887.32<br>(260.00-<br>4934.50) | 159.6<br>(75.37-<br>231.30)    | 3270<br>(1264.67-<br>3270.00) | <0.0001 <sup>a</sup><br><0.0001 <sup>b</sup><br>0.00011 <sup>c</sup><br>0.00011 <sup>d</sup><br><0.0001 <sup>e</sup> | 2496.75 (1759.45-<br>2846.39)<br>2993.36 (2427.74-<br>3086.23)<br>105.63 (75.17-<br>137.95)<br>217.71 (-180.55-<br>1134.18)<br>CI NA |
| <b>Seronegative,<br/>N (%)</b>                                           | 20 (28.2)                      | 3 (4.2)                         | 2 (1.4)                        | 0 (0.0)                       | <0.0001 <sup>f</sup><br>0.064 <sup>g</sup>                                                                           | 0.26 (0.071-0.48)<br>0.041 (-0.015-<br>0.098)                                                                                        |
| <b>IgG titer<br/>change<br/>following 3<sup>rd</sup><br/>dose, N (%)</b> |                                |                                 |                                |                               | 0.00072 <sup>h</sup>                                                                                                 | CI NA                                                                                                                                |
| <b>X1-1.99</b>                                                           | 3 (4.2)                        |                                 | 5 (3.5)                        |                               |                                                                                                                      |                                                                                                                                      |
| <b>X2-9.99</b>                                                           | 9 (12.5)                       |                                 | 12 (8.3)                       |                               |                                                                                                                      |                                                                                                                                      |
| <b>X10-49.99</b>                                                         | 28 (38.9)                      |                                 | 96 (66.7)                      |                               |                                                                                                                      |                                                                                                                                      |
| <b>X5-99.99</b>                                                          | 16 (22.2)                      |                                 | 22 (15.3)                      |                               |                                                                                                                      |                                                                                                                                      |
| <b>X100-999.99</b>                                                       | 13 (18.1)                      |                                 | 9 (5.6)                        |                               |                                                                                                                      |                                                                                                                                      |
| <b>X1000-5000</b>                                                        | 3 (4.2)                        |                                 | 0 (6.3)                        |                               |                                                                                                                      |                                                                                                                                      |

Comparison of median IgG Ab levels within groups was determined by related-samples sign test and comparison of median IgG Ab levels between groups was analyzed using Independent-Samples Mann-Whitney U and Kolmogorov-Smirnov Tests.

The associations between serology status and being a cancer patient, the association between serology status and 3<sup>rd</sup> dose delivery among cancer patients and the association between IgG titer change following 3<sup>rd</sup> dose and cancer diagnosis were assessed by the parametric chi-square. All p-values are two-tailed.

<sup>a</sup>P value for the comparison of median IgG Ab before and after the 3<sup>rd</sup> dose of the BNT162b2 vaccine among cancer patients.

<sup>b</sup>P value for the comparison of median IgG Ab before and after the 3<sup>rd</sup> dose of the BNT162b2 vaccine among healthy control.

<sup>c</sup>P value for the comparison between healthy control and cancer patients median IgG Ab before the 3<sup>rd</sup> dose of the BNT162b2 vaccine.

<sup>d</sup>P value for the comparison between healthy control and cancer patients median IgG Ab after the 3<sup>rd</sup> dose of the BNT162b2 vaccine.

<sup>e</sup>P for multivariate analysis assessing the effects of study group (patient or control) and time (before or after 3<sup>rd</sup> dose) adjusted for the matching factors (age and gender). Administration of the booster was the only significant variable associated with increased titer levels.

<sup>f</sup>P value for the association between serology status and study group (healthy vs. cancer patients) before 3<sup>rd</sup> dose delivery.

<sup>g</sup>P value for the association between serology status and study group (healthy vs. cancer patients) after 3<sup>rd</sup> dose delivery.

<sup>h</sup>P value for the association between IgG titer change following 3<sup>rd</sup> dose and study group (healthy vs. cancer patients).

CI NA: Confidence interval not available.

\* Immunogenicity analysis for cancer patients was conducted by the SARS-CoV-2 IgG II Quant (Abbott) kit (9) providing values in arbitrary units (AU/ml) ranging between 0-40,000 for anti-S antibodies, where a level >50 AU/mL considered positive according to the manufacturer's instructions. A conversion factor between AU/mL and BAU/mL has been established as 1 BAU = 0.142 AU (9). For the control group, SARS-CoV-2 IgG titers were analyzed by the ADVIA Centaur (Siemens Healthineers) kit (8), providing an index value up to 150.00, where an index equal to or greater than 1.00 is considered reactive (positive) for SARS-CoV-2 IgG antibodies. A conversion factor between index values and the WHO binding antibody units (BAU/mL) has been established: 1.00 Index on the sCOVG assay would have a WHO BAU/mL value of 21.81 (10). IQR= Interquartile range.

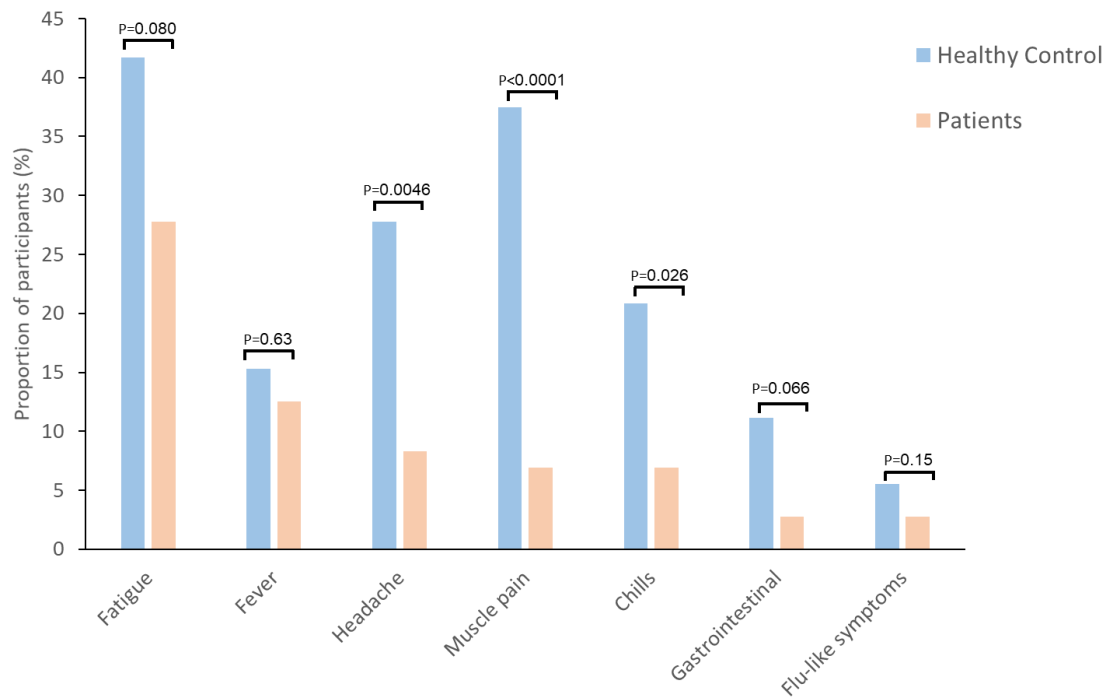

**Figure S1:** Systemic side effects following BNT162b2 mRNA 3<sup>rd</sup> dose vaccination among 72 actively treated cancer patients and matched control by age and sex. Bars show the proportion of participants reporting on each side-effect. Only side effects reported by more than 1% of the patients are presented. Differences in the proportion of side effects between control group and cancer patients group were statistical envaulted by the parametric chi-square. All p-values are two-tailed.

COVI3 study investigators:

Dr. Ifat Alkalay, PhD

Dr. Nadav Amrami, MD

Dr. Yoel Angel, MD, MBA

Prof. Ronen Ben-Ami, MD

Dr. Yotam Bronstein, M.D

Dr. Amanda Chikly, MD

Dr. Ofir Elalouf, MD

Dr. Meital Elbaz, MD

Prof. Ori Elkayam, MD

Dr. Anna Eshkol, MD

Dr. Tali Eviatar, MD

Dr. Eugene Feigin, MD

Dr. Nadav Friedel, MD

Dr. Victoria Furer, MD

Dr. Moran Furman, MD

Prof. Ronni Gamzu, MD, PhD,  
MBA, LLB

Dr. Ilana Goldiner, PhD, MHA

Dr. Hanoch Goldshmidt, PhD,  
MBA

Ms. Ora Halutz, MSc

Dr. Oryan Henig, MD

Dr. Ayelet Itzhaki-Alfia, PhD

Dr. Tal Levinson, MD

Ms. Or Marudi, MSc

Dr. Talia Mayer, MD, MHA

Dr. Suzy Meijer, MD

Dr. Ariel Melloul, MD

Dr. Michal Mizrahi, MD

Dr. Yael Paran, MD

Dr. Dana Rosenberg, MD

Dr. Ari Safir, MD

Dr. Esther Saiag, MD, MHA,  
MSc

Dr. Adi Silberman, MD

Dr. Marina Slobodkin, MD

Dr. Liron Spitzer, MD

Dr. Avishay Spitzer, MD

Prof. Eli Sprecher, MD, PhD,  
MBA

Dr. Moshe Stark, PhD

Dr. Eyal Taleb, MD

Dr. Michal Yakubovsky, MD

Prof. David Zeltser, MD, MHA
